# Supplementary material for: Light-activated inorganic CsPbBr2I perovskite for room-temperature self-powered chemical sensing
Source: Royal Society of Chemistry journal article supplement (doi:10.1039/c9cp03059j), 2019-01-01
Supplement: c9cp03059j1.pdf [file c9cp03059j1.pdf]

## Supporting Information

### **Light-activated Inorganic CsPbBr<sub>2</sub>I Perovskite for Room-Temperature Self-Powered Chemical Sensing**

*Hongjun Chen\**, Meng Zhang, Xiao Fu, Zelio Fusco, Renheng Bo, Bobo Xing, Hieu T. Nguyen, Chog Barugkin, Jianghui Zheng, Cho Fai Jonathan Lau, Shujuan Huang, Anita W. Y. Ho-Baillie, Kylie R. Catchpole and Antonio Tricoli\*

Dr. H. Chen, Z. Fusco, R. Bo, B. Xing, Prof. A. Tricoli  
Nanotechnology Research Laboratory, Research School of Electrical, Energy and Materials Engineering, College of Engineering and Computer Sciences, Australian National University, Canberra 2601, Australia

E-mail: antonio.tricoli@anu.edu.au; hongjun.chen@anu.edu.au

Dr. M. Zhang, J. Zheng, C. F. J. Lau, Dr. S. Huang, Assoc. Prof. A. W. Y. Ho-Baillie,  
Australian Centre for Advanced Photovoltaics, School of Photovoltaic and Renewable Energy Engineering, University of New South Wales, Sydney 2052, Australia

X. Fu, Dr. H. T. Nguyen, Dr. C. Barugkin, Prof. K. R. Catchpole  
Research School of Electrical, Energy and Materials Engineering, College of Engineering and Computer Sciences, Australian National University, Canberra 2601, Australia

Keywords: Inorganic halides perovskites, chemical sensors, trap states, self-powered, volatile organic compounds

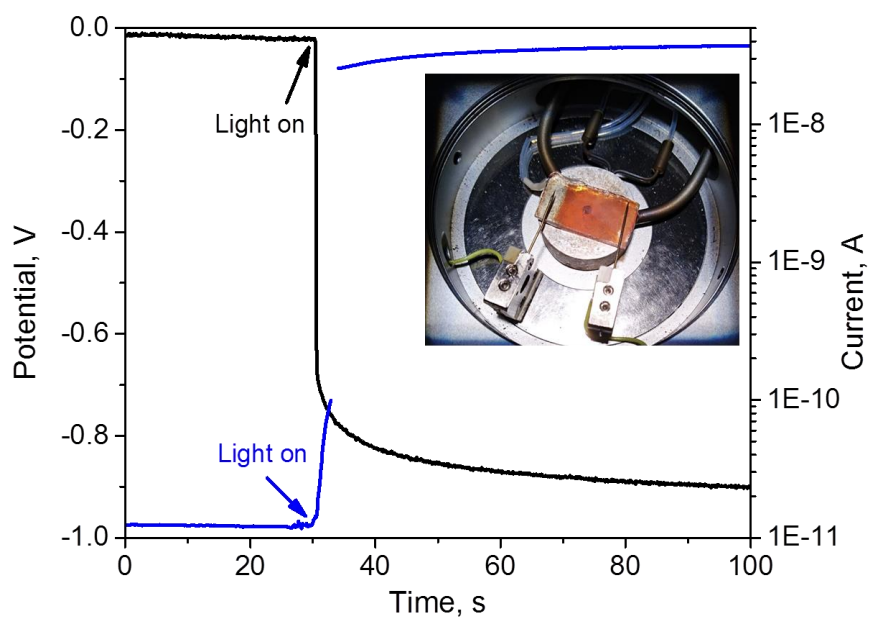

**Fig. S1.** The open circuit potential (black line) and short-circuit current (blue line) of CPBI devices in dark and simulated solar irradiation, the inset is the picture of the CPBI device with the top contact. The measurements were conducted under simulated air atmosphere. The broken blue line is due to changing the current scale.

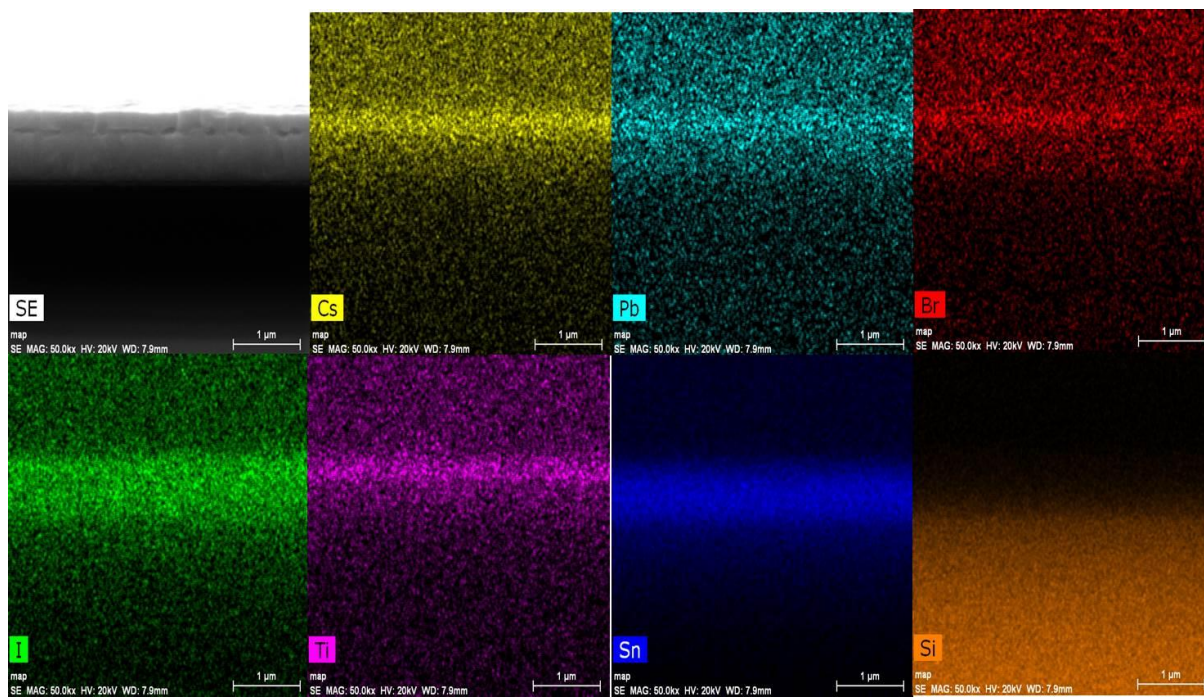

**Fig. S2.** EDS mapping of various elements distributed within the cross-section of CPBI film on a compact TiO<sub>2</sub> layer on a FTO glass substrate, the scale bar is 1 micrometre.

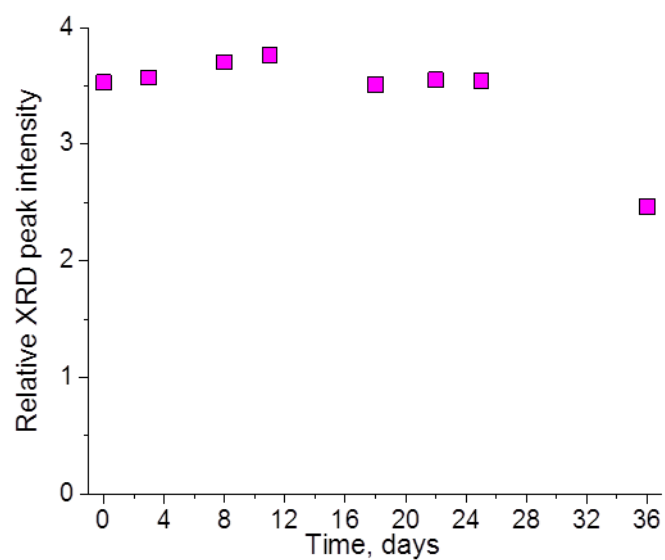

**Fig. S3.** The structural stability of CPBI devices with different storage time. The relative XRD peak intensity was calculated based on the ratio between the (100) peak of CPBI located at  $2\theta$  of  $15.2^\circ$  and the main peak of FTO located at  $2\theta$  of  $26.5^\circ$ .

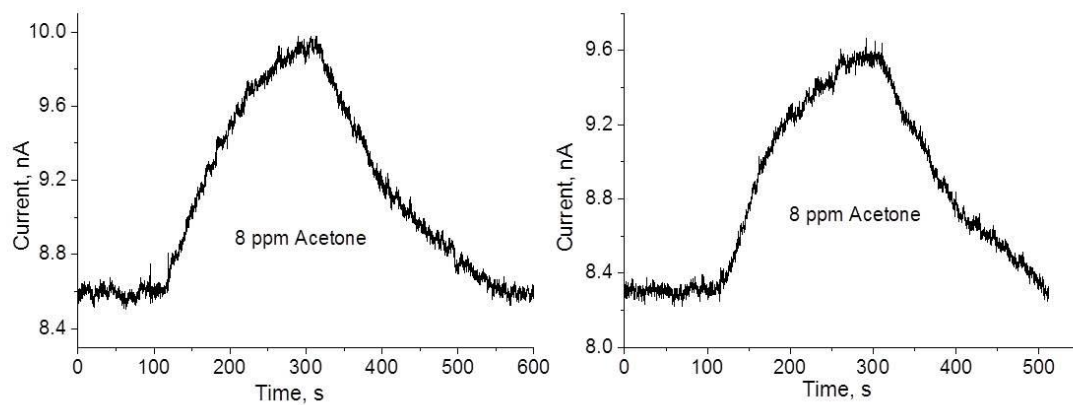

**Fig. S4.** Photocurrent response kinetics of two different batches of CPBI sensors to injection of 8 ppm of acetone in pure N<sub>2</sub>.

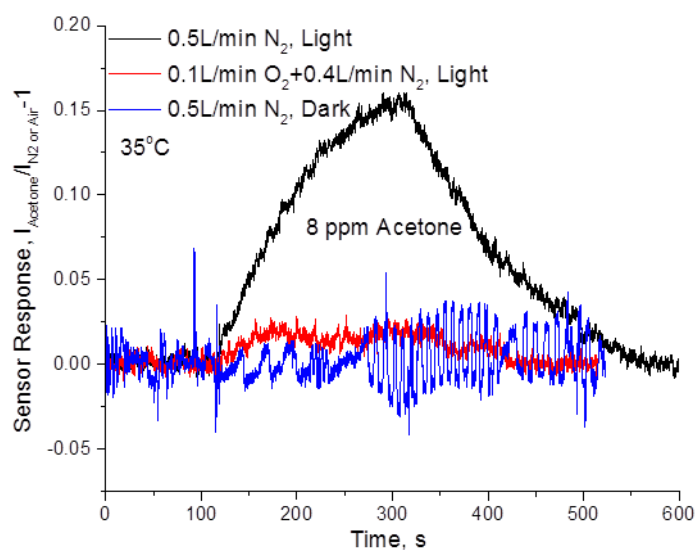

**Fig. S5.** Dynamic CPBI sensor response to injection of 8 ppm of acetone in pure N<sub>2</sub> (black line) and simulated air (red line) under simulated solar irradiation (AM 1.5, 42.3 mWcm<sup>-2</sup>), and in pure N<sub>2</sub> under dark (blue line). Due to the tiny current under dark (~ 0.13 nA), the sensor response of CPBI in pure N<sub>2</sub> under dark is quite noisy.

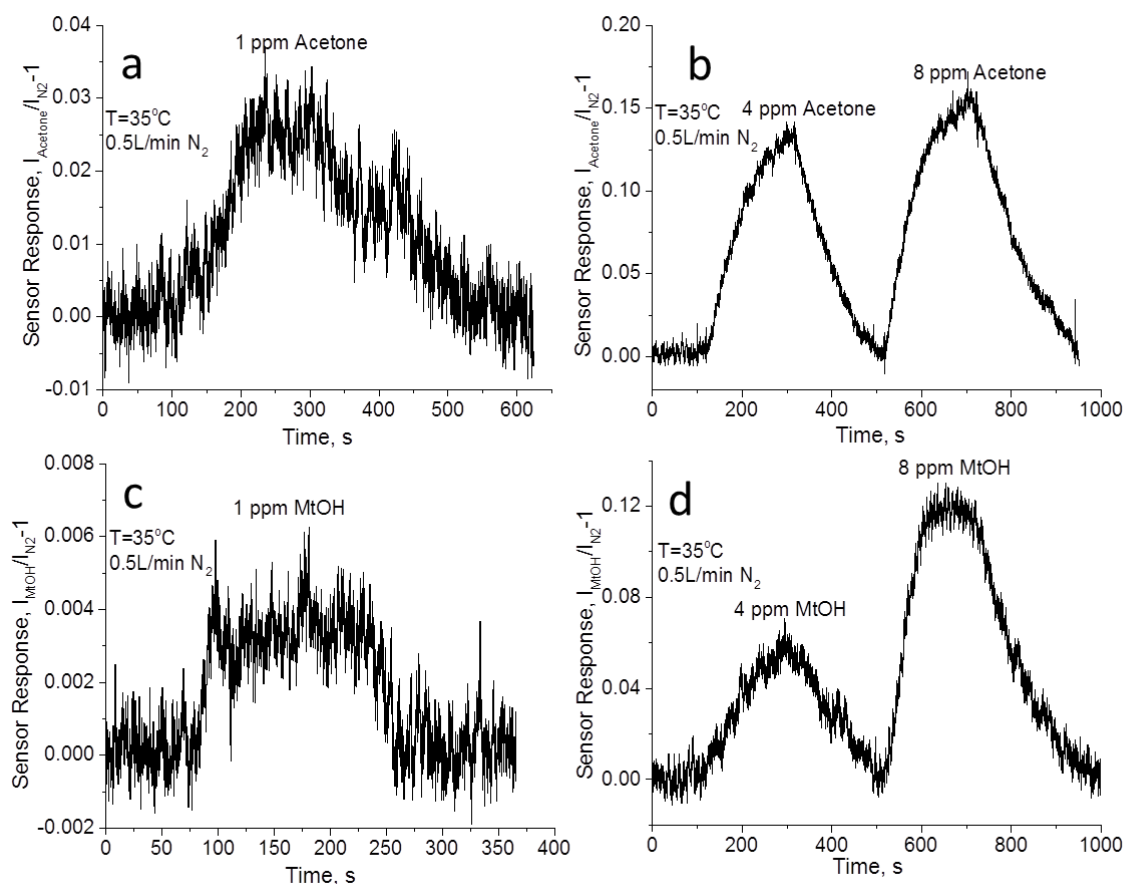

**Fig. S6.** Dynamic CPBI sensor response to injection of 1 ppm (a and c), 4 and 8 ppm (b and d) of acetone (a and b) and methanol (c and d) in pure N<sub>2</sub> atmosphere under simulated solar irradiation (AM 1.5, 42.3 mWcm<sup>-2</sup>). Due to the switch of mass flow controllers with different gas flow rate ranges, the dynamic curve of CPBI sensor for the same gas with different concentrations are draw separately.

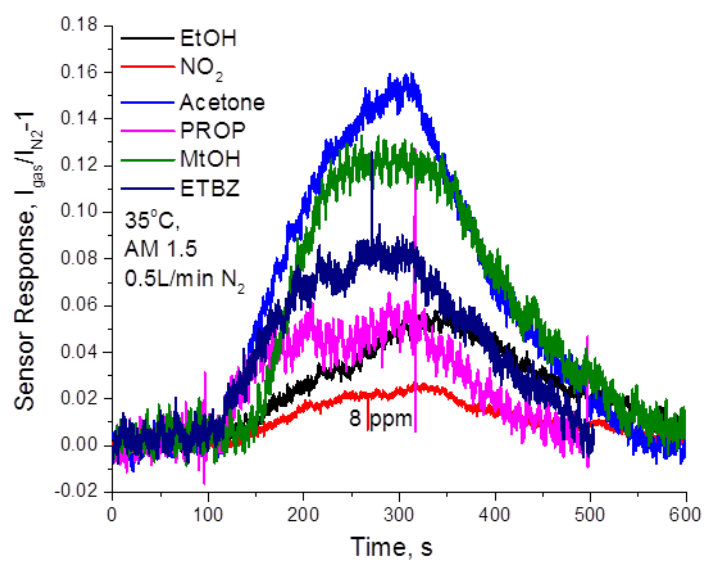

**Fig. S7.** Dynamic CPBI sensor response to injection of 8 ppm of five VOCs and one NO<sub>2</sub> gases in pure N<sub>2</sub> atmosphere under simulated solar irradiation (AM 1.5, 42.3 mWcm<sup>-2</sup>).



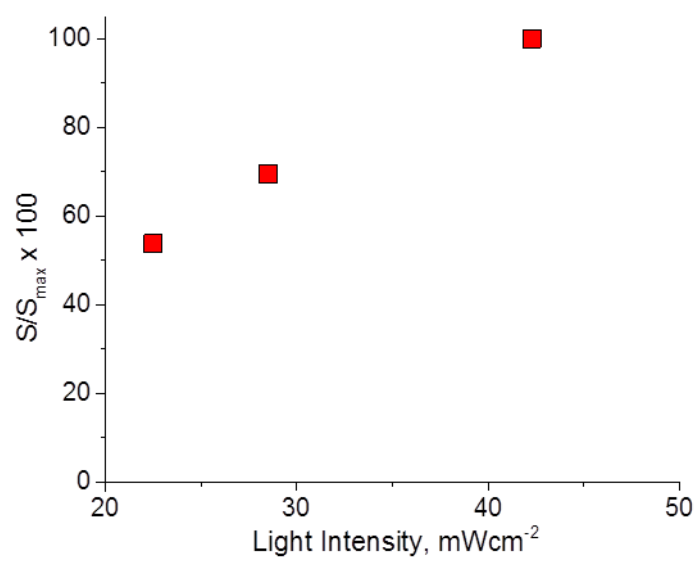

**Fig. S8.** The relationship between the sensor response and illumination light intensity.

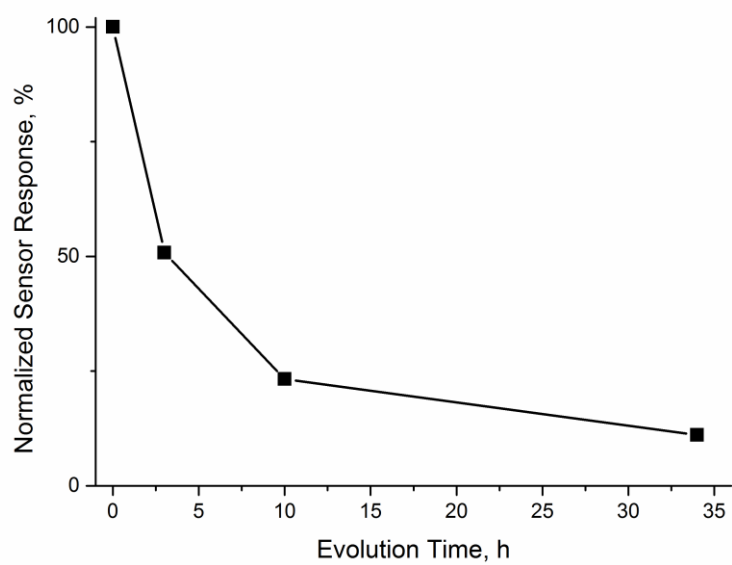

**Fig. S9.** The sensor response of the device as a function of evolution time under air with humidity around 20-35%.

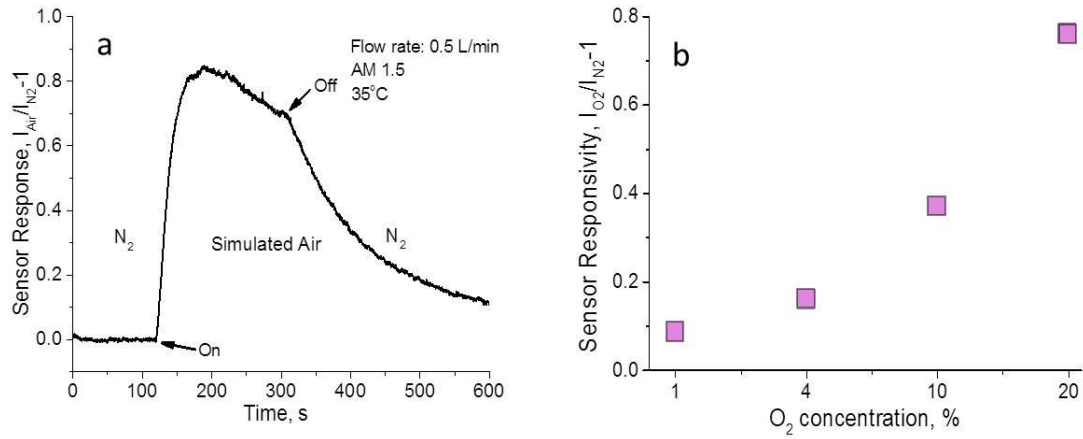

**Fig. S10.** Dynamic CPBI sensor response to different environmental atmospheres (0.5 L/min  $N_2$  or 0.4 L/min  $N_2$  + 0.1 L/min  $O_2$ ) under simulated solar irradiation (AM 1.5,  $42.3 \text{ mWcm}^{-2}$ ) and the response time is ca. 34 s (the time to reach 90% of the maximum sensor response) (a), and CPBI sensor responsivity as function of the  $O_2$  concentration in  $N_2$  from 1% to 20 % (b).

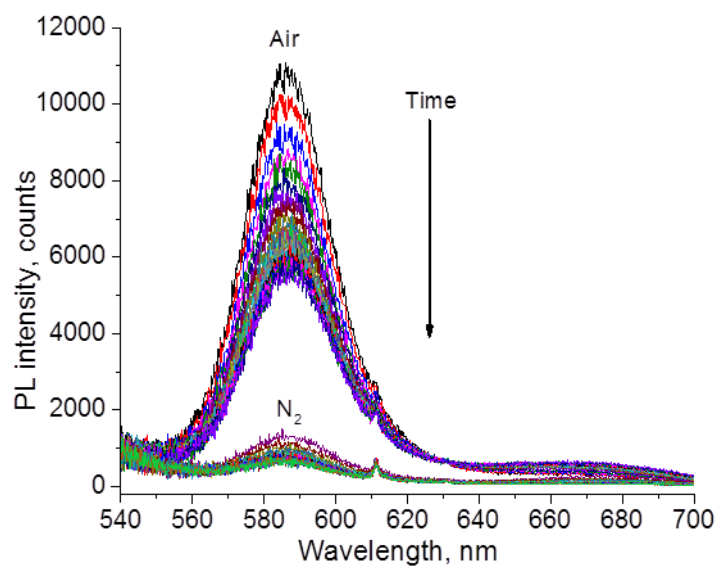

**Fig. S11.** The consecutive PL spectra of CPBI sensor under different environmental atmospheres.

**Table S1.** the summary of the state-of-art perovskite based and other photo- and chemoresistive sensors.

| <b>Material</b>                                                       | <b>Light</b> | <b>Bias</b> | <b>Response time</b> | <b>Analyte gas/LOD*</b>                                    | <b>Ref.</b> |
|-----------------------------------------------------------------------|--------------|-------------|----------------------|------------------------------------------------------------|-------------|
| CsPbBr <sub>2</sub> I                                                 | Y            | N           | ~ 100-150 s          | Various VOCs / 1 ppm                                       | This work   |
| CH <sub>3</sub> NH <sub>3</sub> PbI <sub>3-x</sub> Cl <sub>x</sub>    | Y            | N           | ~ 188-225 s          | O <sub>3</sub> / 5 ppb                                     | 1           |
| CsPbBr <sub>3</sub>                                                   | Y            | N           | ~ 17-77 s            | O <sub>2</sub> / 1%<br>Acetone / 1 ppm;<br>Ethanol / 1 ppm | 2           |
| CH <sub>3</sub> NH <sub>3</sub> PbI <sub>3</sub>                      | N            | Y/ 4 V      | ~400 ms              | O <sub>2</sub> / 70 ppm                                    | 3           |
| CH <sub>3</sub> NH <sub>3</sub> PbI <sub>3-x</sub> Cl <sub>x</sub>    | N            | Y/ 10 V     | ~1400 s              | Moisture/32 %                                              | 4           |
| CH <sub>3</sub> NH <sub>3</sub> PbI <sub>3</sub>                      | N            | Y/ 10 V     | ~22 s                | NO <sub>2</sub> / 1 ppm                                    | 5           |
| CH <sub>3</sub> NH <sub>3</sub> PbI <sub>3</sub>                      | N            | Y/ 1.5 V    | ~ 3 s                | NH <sub>3</sub> / 33 %                                     | 6           |
| CH <sub>3</sub> NH <sub>3</sub> PbI <sub>3-x</sub> (SCN) <sub>x</sub> | N            | Y/ 1 V      | ~ 220-270 s          | Acetone / 20 ppm;<br>NO <sub>2</sub> / 200 ppb             | 7           |
| p-Si/n-ZnO                                                            | Y            | N           | ~ 1500 s             | NO <sub>2</sub> / 250 ppb                                  | 8           |
| CdS@n-ZnO/p-Si                                                        | Y            | N           | ~ 1200 s             | Ethanol / 50 ppm,<br>methane / 50 ppm                      | 9           |
| NiO-ZnO nanoheterojunction networks                                   | Y            | Y / 1 V     | ~ 900 s              | Various VOCs including ethanol, acetone, etc. / 1 ppm      | 10          |
| Cobalt-doped ZnO (1%) nanobelts                                       | Y            | Y / 9.65 V  | ~ 90-120 s           | Ethanol / 2.9 Torr                                         | 11          |
| ZnO/Ag <sub>2</sub> S heterogeneous microspheres                      | Y            | Y / 9.65 V  | ~ 10 s               | Ethanol / 50 ppm                                           | 12          |
| porphyrin-functionalized ZnO nanorod                                  | Y            | Y / 1 V     | ~ 100 s              | Ethanol / 8%;<br>Triethylamine / 8%                        | 13          |

LOD\*, limit of detection;

**Table S2.** Room-temperature response time of various chemoresistive MOS sensors to VOCs.

| <b>Material</b>                                     | <b>Response time</b> | <b>Analyte gas</b>                               | <b>Ref.</b> |
|-----------------------------------------------------|----------------------|--------------------------------------------------|-------------|
| CsPbBr <sub>2</sub> I                               | ~ 2-3 min            | various VOCs including ethanol, acetone, etc.    | This work   |
| NiO-ZnO nanoheterojunction networks                 | ~ 15 min             | various VOCs including ethanol, acetone, etc.    | 10          |
| p-Si/n-ZnO                                          | ~ 25 min             | NO <sub>2</sub>                                  | 8           |
| CdS@n-ZnO/p-Si                                      | ~ 20 min             | O <sub>2</sub> , ethanol, methane                | 9           |
| WO <sub>3</sub>                                     | ~ 25 min             | NO <sub>2</sub>                                  | 14          |
| Nanoporous In <sub>2</sub> O <sub>3</sub> particles | ~ 25 min             | ozone                                            | 15          |
| Nanocrystalline ZnO sensitized with CdSe            | ~ 50 min             | NO <sub>2</sub>                                  | 16          |
| cobalt-doped ZnO nanobelts                          | ~ 10 min             | Ethanol                                          | 11          |
| ZnO nanorods/SnO <sub>2</sub> nanoparticles         | ~ 25 min             | NO <sub>2</sub>                                  | 17          |
| polycrystalline ZnO                                 | ~ 15 min             | H <sub>2</sub>                                   | 18          |
| ZnO nanorods                                        | ~ 13 min             | Formaldehyde                                     | 19          |
| quasi-2D Cu <sub>2</sub> O/SnO <sub>2</sub>         | ~ 10 min             | H <sub>2</sub> S                                 | 20          |
| Nanopatterned polycrystalline ZnO                   | ~ 13 min             | H <sub>2</sub> , NO <sub>2</sub>                 | 21          |
| ZnO nanoparticles                                   | ~ 8.5 min            | Ethanol                                          | 22          |
| SnO <sub>2</sub> pyrolytic films                    | ~ 10 min             | acetone and trichloroethylene                    | 23          |
| Hollow TiO <sub>2</sub> microspheres                | ~ 8-10 min           | formaldehyde                                     | 24          |
| copper-doped ZnO                                    | ~ 10 min             | ethanol and acetone                              | 25          |
| SnO <sub>2</sub> thin films                         | ~ 2-3 min            | various VOCs including ethanol, 2-pentanone, etc | 26          |

## References

1. G. Kakavelakis, E. Gagaoudakis, K. Petridis, V. Petromichelaki, V. Binas, G. Kiriakidis and E. Kymakis, *ACS Sens.*, 2018, **3**, 135-142.
2. H. Chen, M. Zhang, R. Bo, C. Barugkin, J. Zheng, Q. Ma, S. Huang, A. W. Y. Ho-Baillie, K. R. Catchpole and A. Tricoli, *Small*, DOI: 10.1002/sml.201702571, 1702571.
3. M.-A. Stoeckel, M. Gobbi, S. Bonacchi, F. Liscio, L. Ferlauto, E. Orgiu and P. Samorì, *Adv. Mater.*, 2017, **29**, 1702469.
4. L. Hu, G. Shao, T. Jiang, D. Li, X. Lv, H. Wang, X. Liu, H. Song, J. Tang and H. Liu, *ACS Appl. Mater. Interfaces*, 2015, **7**, 25113-25120.
5. X. Fu, S. Jiao, N. Dong, G. Lian, T. Zhao, S. Lv, Q. Wang and D. Cui, *RSC Adv.*, 2018, **8**, 390-395.
6. C. Bao, J. Yang, W. Zhu, X. Zhou, H. Gao, F. Li, G. Fu, T. Yu and Z. Zou, *Chem. Commun.*, 2015, **51**, 15426-15429.
7. Y. Zhuang, W. Yuan, L. Qian, S. Chen and G. Shi, *Phys. Chem. Chem. Phys.*, 2017, **19**, 12876-12881.
8. M. W. G. Hoffmann, L. Mayrhofer, O. Casals, L. Caccamo, F. Hernandez-Ramirez, G. Lilienkamp, W. Daum, M. Moseler, A. Waag, H. Shen and J. D. Prades, *Adv. Mater.*, 2014, **26**, 8017-8022.
9. M. W. G. Hoffmann, A. E. Gad, J. D. Prades, F. Hernandez-Ramirez, R. Fiz, H. Shen and S. Mathur, *Nano Energy*, 2013, **2**, 514-522.
10. H. Chen, R. Bo, A. Shrestha, B. Xin, N. Nasiri, J. Zhou, I. Di Bernardo, A. Dodd, M. Saunders, J. Lipton-Duffin, T. White, T. Tsuzuki and A. Tricoli, *Adv. Optical Mater.*, **0**, 1800677.
11. L. Peng, Q. Zeng, H. Song, P. Qin, M. Lei, B. Tie and T. Wang, *Appl. Phys. A*, 2011, **105**, 387-392.
12. Y. Zhang, B. Liu, D. Wang, Y. Lin, T. Xie and J. Zhai, *Mater. Chem. Phys.*, 2012, **133**, 834-838.
13. Y. Sivalingam, E. Martinelli, A. Catini, G. Magna, G. Pomarico, F. Basoli, R. Paolesse and C. Di Natale, *J. Phys. Chem. C*, 2012, **116**, 9151-9157.
14. C. Zhang, A. Boudiba, P. De Marco, R. Snyders, M.-G. Olivier and M. Debligny, *Sens. Actuators, B*, 2013, **181**, 395-401.
15. D. Klaus, D. Klawinski, S. Amrehn, M. Tiemann and T. Wagner, *Sens. Actuators, B*, 2015, **217**, 181-185.
16. A. S. Chizhov, M. N. Romyantseva, R. B. Vasiliev, D. G. Filatova, K. A. Drozdov, I. V. Krylov, A. M. Abakumov and A. M. Gaskov, *Sens. Actuators, B*, 2014, **205**, 305-312.
17. G. Lu, J. Xu, J. Sun, Y. Yu, Y. Zhang and F. Liu, *Sens. Actuators, B*, 2012, **162**, 82-88.
18. S.-W. Fan, A. K. Srivastava and V. P. Dravid, *Appl. Phys. Lett.*, 2009, **95**, 142106.
19. L. Peng, Q. Zhao, D. Wang, J. Zhai, P. Wang, S. Pang and T. Xie, *Sens. Actuators, B*, 2009, **136**, 80-85.
20. G. Cui, M. Zhang and G. Zou, *Sci. Rep.*, 2013, **3**, 1250.
21. S.-W. Fan, A. K. Srivastava and V. P. Dravid, *Sens. Actuators, B*, 2010, **144**, 159-163.
22. Z. Q. Zheng, J. D. Yao, B. Wang and G. W. Yang, *Sci. Rep.*, 2015, **5**, 11070.
23. J. Saura, *Sens. Actuators, B*, 1994, **17**, 211-214.
24. X. Li, X. Li, J. Wang and S. Lin, *Sens. Actuators, B*, 2015, **219**, 158-163.
25. L. Peng, T.-F. Xie, M. Yang, P. Wang, D. Xu, S. Pang and D.-J. Wang, *Sens. Actuators, B*, 2008, **131**, 660-664.
26. K. Haddad, A. Abokifa, S. Kavadiya, B. Lee, S. Banerjee, B. Raman, P. Banerjee, C. Lo, J. Fortner and P. Biswas, *ACS Appl. Mater. Interfaces*, 2018, **10**, 29972-29981.
